# Supplementary material for: Convenience versus Biological Significance: Are PMA-Differentiated THP-1 Cells a Reliable Substitute for Blood-Derived Macrophages When Studying in Vitro Polarization?
Source: PubMed Central journal article supplement (PMC5826964; doi:10.3389/fphar.2018.00071), 2018-02-22
Supplement: Presentation_1.pdf [file Presentation_1.pdf]

|          | MDM     |                                         |         |                                         | THP-1   |                                         |         |                                         |
|----------|---------|-----------------------------------------|---------|-----------------------------------------|---------|-----------------------------------------|---------|-----------------------------------------|
|          | M1      |                                         | M2      |                                         | M1      |                                         | M2      |                                         |
|          | p-value | Log <sub>2</sub> fold change vs Resting | p-value | Log <sub>2</sub> fold change vs Resting | p-value | Log <sub>2</sub> fold change vs Resting | p-value | Log <sub>2</sub> fold change vs Resting |
| Eotaxin  | 0.1     | 2.3                                     | >0.1    |                                         | >0.1    |                                         | >0.1    |                                         |
| MIP-1A   | 0.1     | 3.2                                     | >0.1    |                                         | >0.1    |                                         | >0.1    |                                         |
| IL-1β    | 0.1     | 3.7                                     | >0.1    |                                         | 0.1     | 2.7                                     | >0.1    |                                         |
| TNFα     | 0.1     | 2.0                                     | >0.1    |                                         | 0.1     | 1.5                                     | >0.1    |                                         |
| MIP-1B   | 0.1     | 3.5                                     | >0.1    |                                         | 0.1     | 1.4                                     | >0.1    |                                         |
| IL-6     | 0.1     | 4.3                                     | >0.1    |                                         | 0.1     | 1.6                                     | 0.1     | -2.6                                    |
| VEGF-A   | 0.1     | 2.2                                     | >0.1    |                                         | 0.1     | 0.6                                     | 0.1     | -1.2                                    |
| TGF-α    | 0.1     | 2.4                                     | 0.1     | 1.9                                     | >0.1    |                                         | 0.1     | 1.3                                     |
| G-CSF    | 0.1     | 3.0                                     | >0.1    |                                         | >0.1    |                                         | 0.1     | -1.0                                    |
| GM-CSF   | 0.1     | 2.0                                     | >0.1    |                                         | 0.1     | 1.9                                     | >0.1    |                                         |
| sCD40L   | 0.08    | 0.7                                     | >0.1    |                                         | 0.1     | 1.1                                     | >0.1    |                                         |
| IL-1α    | 0.1     | 7.3                                     | >0.1    |                                         | 0.1     | 2.1                                     | >0.1    |                                         |
| IL-15    | na      |                                         | na      |                                         | >0.1    |                                         | 0.1     | 0.7                                     |
| IL-17A   | >0.1    |                                         | >0.1    |                                         | na      |                                         | na      |                                         |
| INFα2    | na      |                                         | na      |                                         | 0.1     | 2.3                                     | >0.1    |                                         |
| IL-12P70 | 0.08    | 1.8                                     | >0.1    |                                         | na      |                                         | na      |                                         |
| IL-9     | 0.1     | 0.7                                     | >0.1    |                                         | na      |                                         | na      |                                         |
| IL-4     | >0.1    |                                         | 0.1     | 6.0                                     | na      |                                         | na      |                                         |
| MCP-3    | na      |                                         | na      |                                         | 0.1     | 1.7                                     | >0.1    |                                         |
| IL-12P40 | 0.1     | 4.4                                     | >0.1    |                                         | na      |                                         | na      |                                         |
| IL-1RA   | na      |                                         | na      |                                         | 0.1     | 0.7                                     | 0.1     | 0.9                                     |
| IL-2     | 0.1     | 1.7                                     | >0.1    |                                         | na      |                                         | na      |                                         |
| IL-7     | 0.1     | 1.7                                     | >0.1    |                                         | na      |                                         | na      |                                         |
| IL-8     | 0.1     | 1.9                                     | >0.1    |                                         | na      |                                         | na      |                                         |
| MCP-1    | 0.1     | 1.1                                     | >0.1    |                                         | na      |                                         | na      |                                         |
| RANTES   | 0.1     | 3.3                                     | >0.1    |                                         | na      |                                         | na      |                                         |
| TNFB     | 0.1     | 1.8                                     | >0.1    |                                         | na      |                                         | na      |                                         |
| INFγ     | 0.1     | 2.6                                     | >0.1    |                                         | na      |                                         | na      |                                         |
| GRO      | na      |                                         | na      |                                         | 0.1     | 2.2                                     | >0.1    |                                         |

**Supplementary Table 1.** Statistical analysis of Luminex data.

Results of the variance analysis performed with the Kruskal-Wallis test considering the three experimental conditions (Resting, M1 and M2) are expressed as *p* values. When *p* was  $\leq 0.1$ , *post hoc* analysis was carried out using the Mann-Whitney test, comparing M1 vs. Resting and M2 vs. Resting. The results of such analyses are reported where indicated.

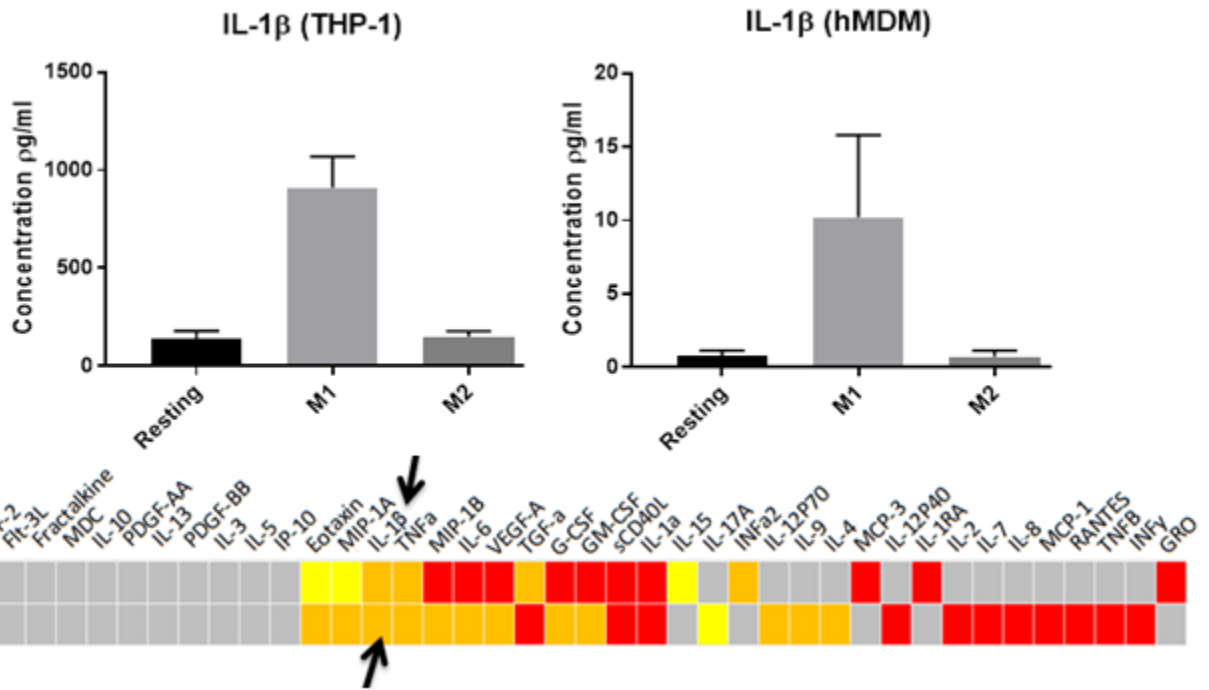

**Supplementary Figure 1:** Example of how setting a fixed cut-off at  $p=0.05$  would have led, in many instances, to label as 'non-significant' clear biological differences in our data set. In the case of IL-1 $\beta$ , a well-known M1 marker, M1 polarization leads to an obvious increase in secretion in both cell types. Still, variance analysis carried out with the Kruskal-Wallis test yielded  $p$ -values comprised between 0.07 and 0.05.

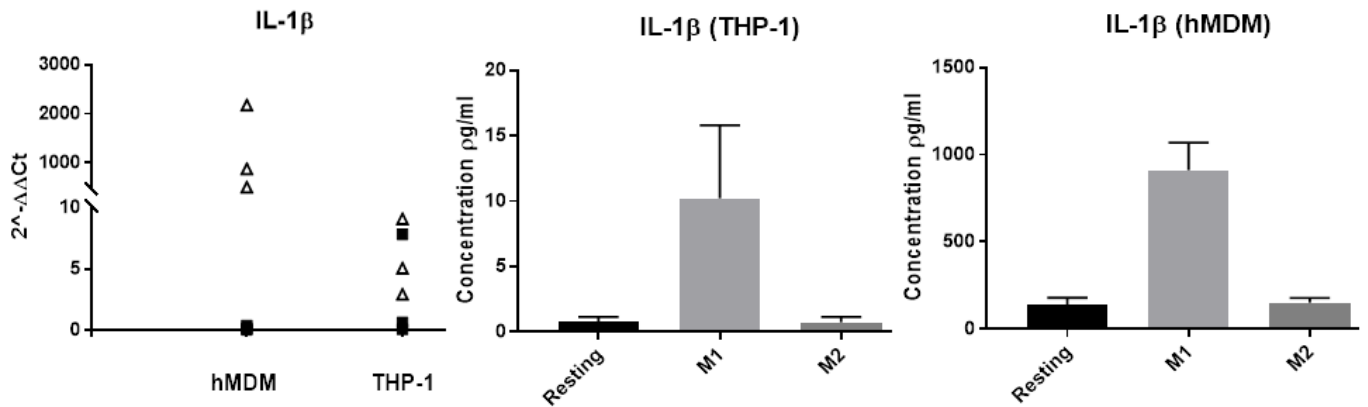

**Supplementary Figure 2:** In some instances, polarization affected gene expression and the protein secretion levels to different extents. Once again, taking IL-1 $\beta$  as an example, one can see how in THP-1 cells seemingly low differences at the transcriptional did not match the large variations found at the protein secretion level.

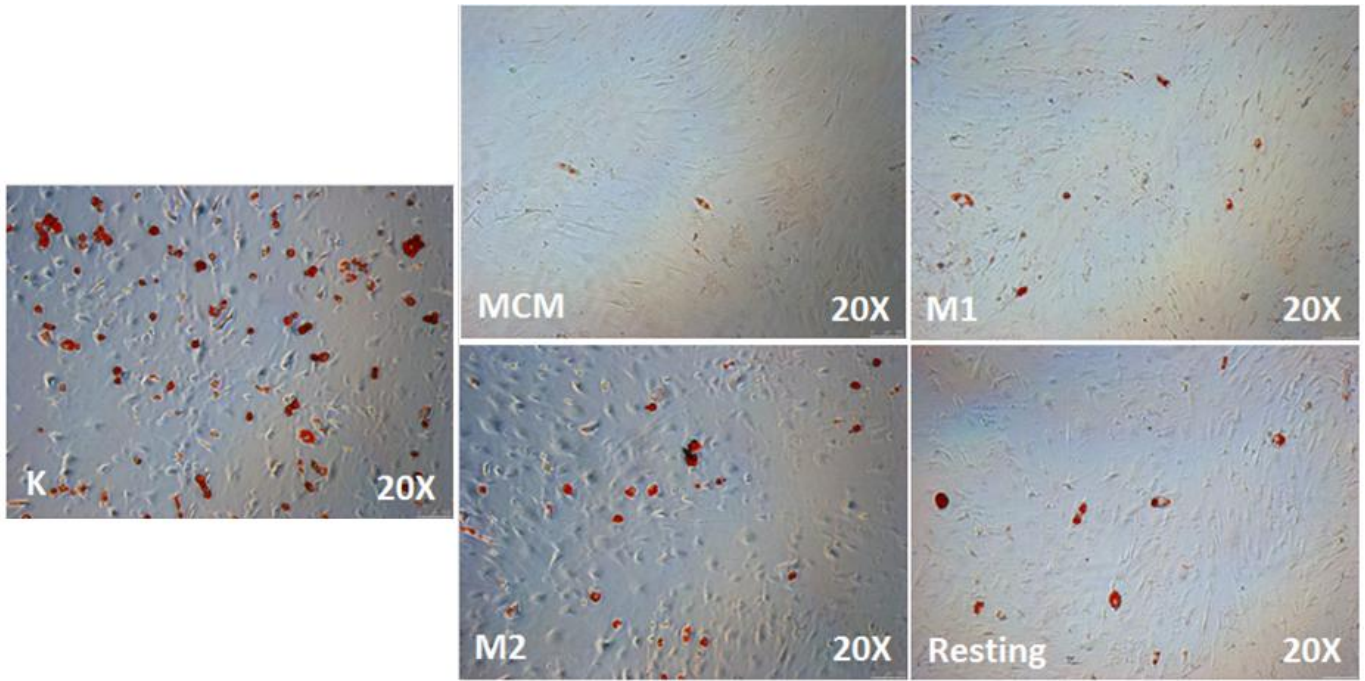

**Supplementary Figure 3:** Example of Oil Red-O staining performed on FAPs to mark adipocytes (stained in red).

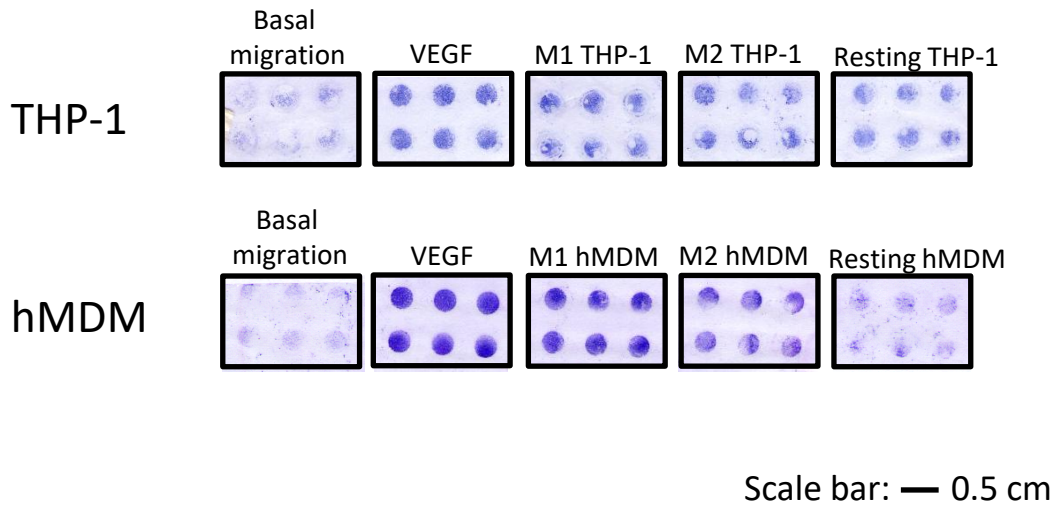

**Supplementary Figure 4:** Example of stained membranes obtained from the chemotaxis assays.
